# Supplementary material
Source: PubMed Central journal article supplement (PMC6150884)

Group A

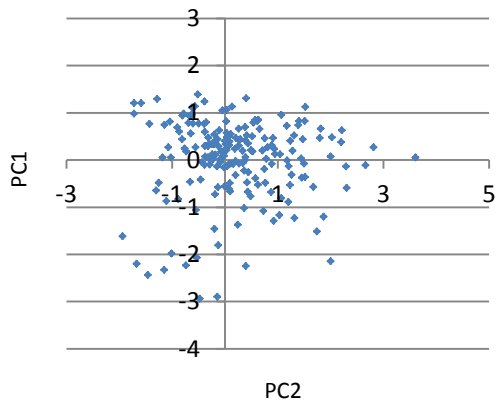

Group B

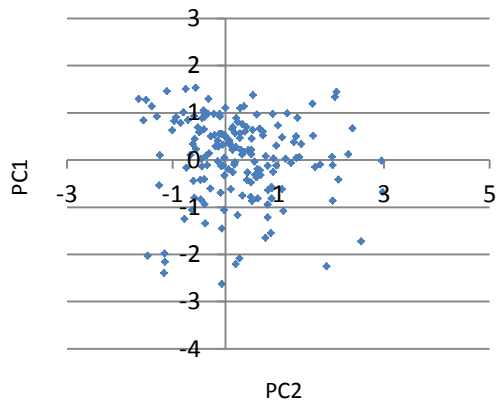

Group C

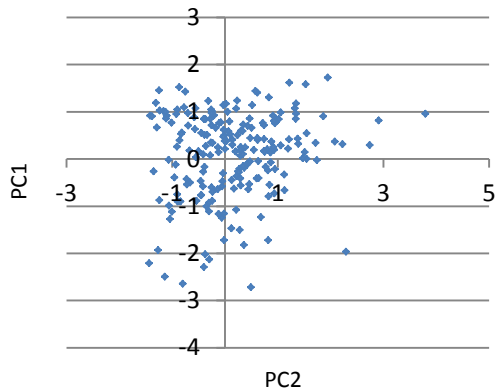

Group D

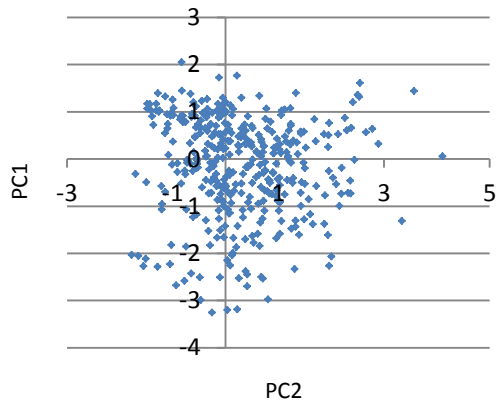

Supplement: 10815_2018_1256_MOESM1_ESM.pdf [file 10815_2018_1256_MOESM1_ESM.pdf]
